# Supplementary material
Source: PubMed Central journal article supplement (PMC4316727)
Supplement: NIHMS537322-supplement-Supplementary_Data.pdf [file NIHMS537322-supplement-Supplementary_Data.pdf]

# Synthesis, X-Ray Crystallographic Characterization, and Electronic Structure Studies of a Di-Azide Iron(III) Complex: Implications for the Azide Adducts of Iron(III) Superoxide Dismutase

Laurie E. Grove, Jason K. Hallman, Joseph P. Emerson, Jason A. Halfen, and Thomas C. Brunold\*

## Supporting Information.

**Table S1.** Crystal structure coordinates for  $\text{LFe}(\text{N}_3)_2$  measured in Å used for geometry optimization input files.

**Table S2.** Cartesian coordinates (Å) for a DFT energy minimized model of  $\text{LFe}(\text{N}_3)_2$  using the BP functional.

**Table S3.** Cartesian coordinates (Å) for a DFT energy minimized model of  $\text{LFe}(\text{N}_3)_2$  using the B3LYP functional.

**Table S4.** Zero-field splitting parameters from INDO/S-CI calculations for all models of  $\text{LFe}(\text{N}_3)_2$ .

**Table S5.** ORCA DFT (B3LYP) calculated spin-down molecular orbital energies (eV), occupancies, and compositions (%) for the  $\text{LFe}(\text{N}_3)_2$  model derived from the crystal structure.

**Table S6.** ORCA DFT (PBE0) calculated spin-down molecular orbital energies (eV), occupancies, and compositions (%) for the ORCA (BP) geometry optimized  $\text{LFe}(\text{N}_3)_2$  model.

**Table S7.** ORCA DFT (PBE0) calculated spin-down molecular orbital energies (eV), occupancies, and compositions (%) for the ORCA (B3LYP) geometry optimized  $\text{LFe}(\text{N}_3)_2$  model.

**Table S8.** Experimental transition energies ( $\text{cm}^{-1}$ ) and TD-DFT predicted transition energies ( $\text{cm}^{-1}$ ) and band assignments using the B3LYP functional and the  $\text{LFe}(\text{N}_3)_2$  model derived from the crystal structure coordinates.

**Table S9.** Experimental transition energies ( $\text{cm}^{-1}$ ) and TD-DFT predicted transition energies ( $\text{cm}^{-1}$ ) and band assignments using the PBE0 functional and the  $\text{LFe}(\text{N}_3)_2$  model geometry optimized using the BP functional.

**Figure S1.** Electronic absorption spectrum of  $\text{LFe}(\text{N}_3)_2$  at room temperature.

**Figure S2.** Electronic absorption and variable temperature MCD spectra collected at 4.5 K of a  $\text{LFe}(\text{N}_3)_2$  mull sample.

**Figure S3.** Contour plot of  $\chi^2$  values as a function of D and E/D parameters for fits of VTVH MCD data collected for  $\text{LFe}(\text{N}_3)_2$  at  $20\,661\text{ cm}^{-1}$  (484  $\text{cm}^{-1}$ ). Transition polarizations are given in Table S10.

**Table S10.** Zero-field splitting parameters D ( $\text{cm}^{-1}$ ) and E/D, polarizations (%) and  $\chi^2$  values from an analysis of VTVH MCD data for  $\text{LFe}(\text{N}_3)_2$  collected at  $20\,661\text{ cm}^{-1}$  (484 nm).

**Figure S4.** Computed electronic absorption spectrum of  $\text{LFe}(\text{N}_3)_2$  using the B3LYP functional and the model derived from crystal structure coordinates.

**Table S1.** Crystal structure coordinates for LFe(N<sub>3</sub>)<sub>2</sub> measured in Å used for geometry optimization input files.

| Atom | x         | y         | z         |
|------|-----------|-----------|-----------|
| C    | 2.550873  | 1.961853  | -0.016510 |
| C    | 2.902771  | 1.576569  | -1.564438 |
| O    | 0.503525  | -2.187622 | -3.339844 |
| N    | 1.184326  | -1.873810 | 0.142288  |
| N    | 2.007782  | 0.756241  | 0.761063  |
| N    | -0.218826 | -0.493561 | 2.177048  |
| C    | 2.605148  | -1.503342 | -0.086716 |
| C    | 3.005905  | -0.343704 | 0.808900  |
| C    | 1.626083  | 1.192932  | 2.127213  |
| C    | 0.938293  | 0.100143  | 2.920959  |
| C    | -0.181137 | -1.975769 | 2.203049  |
| C    | 1.008179  | -2.548325 | 1.455414  |
| C    | 0.697189  | -2.647507 | -1.009491 |
| C    | 0.512238  | -1.735840 | -2.206436 |
| C    | 3.820847  | 2.727325  | 0.761734  |
| O    | 0.374298  | -0.491364 | -1.912231 |
| C    | -1.548309 | -0.018768 | 2.777481  |
| C    | -1.827423 | -0.616043 | 4.156204  |
| C    | -1.676804 | 1.472458  | 2.810577  |
| H    | 1.766052  | 2.750977  | -0.001343 |
| H    | 3.293518  | 2.470596  | -2.099900 |
| H    | 1.987610  | 1.214127  | -2.083984 |
| H    | 3.672607  | 0.773132  | -1.591171 |
| H    | 2.731705  | -1.208435 | -1.152374 |
| H    | 3.246552  | -2.384262 | 0.139603  |
| H    | 3.066162  | -0.690613 | 1.850983  |
| H    | 3.978714  | 0.071777  | 0.462891  |
| H    | 0.938370  | 2.061554  | 2.020950  |
| H    | 2.557556  | 1.501328  | 2.652542  |
| H    | 1.662064  | -0.720566 | 3.124420  |
| H    | 0.542908  | 0.525635  | 3.870407  |
| H    | -1.122711 | -2.342728 | 1.736649  |
| H    | -0.134125 | -2.290680 | 3.269531  |
| H    | 1.930800  | -2.401871 | 2.060532  |
| H    | 0.847107  | -3.635727 | 1.281464  |
| H    | -0.285568 | -3.099747 | -0.748000 |
| H    | 1.451508  | -3.425232 | -1.264130 |
| H    | 3.534683  | 2.969238  | 1.809814  |
| H    | 4.080322  | 3.670074  | 0.230225  |
| H    | 4.714737  | 2.064392  | 0.774048  |
| H    | -2.358353 | -0.316650 | 2.074844  |
| H    | -2.800354 | -0.239838 | 4.544205  |
| H    | -1.019226 | -0.329636 | 4.865800  |
| H    | -1.869095 | -1.726120 | 4.088638  |
| H    | -2.656174 | 1.760406  | 3.254059  |
| H    | -1.611786 | 1.883194  | 1.778198  |
| H    | -0.858337 | 1.911621  | 3.423767  |
| N    | -0.518570 | 1.902191  | -0.193329 |
| N    | -1.616302 | 2.220000  | -0.607864 |
| N    | -2.621246 | 2.565765  | -0.986496 |
| N    | -1.832809 | -0.774643 | -0.186646 |
| N    | -2.528351 | -0.917221 | -1.136703 |
| N    | -3.231308 | -1.065079 | -1.992767 |
| Fe   | 0.000000  | 0.000000  | 0.000000  |

**Table S2.** Cartesian coordinates (Å) for DFT energy minimized model of  $\text{LFe}(\text{N}_3)_2$  using the BP functional.

| Atom | x         | y         | z         |
|------|-----------|-----------|-----------|
| N    | 0.800186  | -1.790115 | -0.122787 |
| N    | 1.976456  | -1.959427 | -0.447540 |
| N    | 3.097076  | -2.155624 | -0.732910 |
| N    | 1.594116  | 1.159821  | 0.013504  |
| N    | 2.328918  | 1.425171  | -0.938370 |
| N    | 3.055161  | 1.707443  | -1.814209 |
| C    | -2.227921 | -2.464157 | -0.002853 |
| C    | -2.535339 | -2.178818 | -1.482224 |
| O    | -0.870483 | 2.030106  | -3.382065 |
| N    | -1.642014 | 1.621216  | 0.122086  |
| N    | -1.994446 | -1.179900 | 0.775543  |
| N    | -0.044373 | 0.541061  | 2.305191  |
| C    | -2.942627 | 0.961502  | -0.151245 |
| C    | -3.174530 | -0.265869 | 0.745041  |
| C    | -1.563339 | -1.490524 | 2.165955  |
| C    | -1.113358 | -0.261337 | 2.971329  |
| C    | -0.374939 | 1.998352  | 2.264038  |
| C    | -1.626175 | 2.325485  | 1.432037  |
| C    | -1.249023 | 2.471359  | -1.031891 |
| C    | -0.833237 | 1.581024  | -2.234695 |
| C    | -3.295029 | -3.377914 | 0.640518  |
| O    | -0.454193 | 0.356079  | -1.896149 |
| C    | 1.320236  | 0.351410  | 2.956879  |
| C    | 1.422470  | 1.007294  | 4.350357  |
| C    | 1.735382  | -1.126663 | 3.023407  |
| H    | -1.251968 | -2.981094 | 0.031372  |
| H    | -2.675354 | -3.133591 | -2.016663 |
| H    | -1.713226 | -1.629379 | -1.968216 |
| H    | -3.467773 | -1.600876 | -1.618408 |
| H    | -2.930222 | 0.645584  | -1.205688 |
| H    | -3.785355 | 1.676773  | -0.027847 |
| H    | -3.416443 | 0.053955  | 1.772858  |
| H    | -4.077606 | -0.789230 | 0.383972  |
| H    | -0.730225 | -2.209274 | 2.080215  |
| H    | -2.371689 | -1.978195 | 2.751419  |
| H    | -1.978455 | 0.389847  | 3.179214  |
| H    | -0.779358 | -0.618546 | 3.962173  |
| H    | 0.505600  | 2.502365  | 1.830231  |
| H    | -0.538818 | 2.409195  | 3.281250  |
| H    | -2.536575 | 2.050110  | 1.992020  |
| H    | -1.679657 | 3.422485  | 1.294861  |
| H    | -0.375320 | 3.080566  | -0.742172 |
| H    | -2.062653 | 3.155212  | -1.343536 |
| H    | -3.056778 | -3.627518 | 1.687897  |
| H    | -3.341278 | -4.330368 | 0.087051  |
| H    | -4.306854 | -2.933792 | 0.615829  |
| H    | 2.014511  | 0.862671  | 2.265610  |
| H    | 2.425766  | 0.813263  | 4.763611  |
| H    | 0.686279  | 0.591980  | 5.062195  |
| H    | 1.293808  | 2.101044  | 4.315735  |
| H    | 2.741898  | -1.195465 | 3.467590  |
| H    | 1.771606  | -1.584244 | 2.025040  |
| H    | 1.062012  | -1.730942 | 3.656906  |
| Fe   | 0.000000  | 0.000000  | 0.000000  |

**Table S3.** Cartesian coordinates (Å) for DFT energy minimized model of LFe(N<sub>3</sub>)<sub>2</sub> using the B3LYP functional.

| Atom | x         | y         | z         |
|------|-----------|-----------|-----------|
| N    | 0.632187  | -1.848450 | -0.112289 |
| N    | 1.761871  | -2.128922 | -0.453339 |
| N    | 2.829865  | -2.417831 | -0.752319 |
| N    | 1.697510  | 0.991440  | -0.023132 |
| N    | 2.440689  | 1.176239  | -0.963623 |
| N    | 3.166946  | 1.375107  | -1.826630 |
| C    | -2.466156 | -2.214722 | 0.021561  |
| C    | -2.755371 | -1.900757 | -1.450439 |
| O    | -0.680237 | 2.091812  | -3.344406 |
| N    | -1.468048 | 1.789688  | 0.136368  |
| N    | -2.097839 | -0.971481 | 0.797684  |
| N    | 0.034500  | 0.550568  | 2.308685  |
| C    | -2.816574 | 1.255356  | -0.119812 |
| C    | -3.158829 | 0.061447  | 0.773010  |
| C    | -1.677612 | -1.313995 | 2.172470  |
| C    | -1.097504 | -0.141800 | 2.967484  |
| C    | -0.148895 | 2.022705  | 2.260056  |
| C    | -1.361038 | 2.471268  | 1.439255  |
| C    | -0.999130 | 2.579285  | -1.017197 |
| C    | -0.685608 | 1.650970  | -2.218475 |
| C    | -3.604507 | -3.013184 | 0.682129  |
| O    | -0.437073 | 0.414261  | -1.867523 |
| C    | 1.374084  | 0.220245  | 2.934448  |
| C    | 1.557526  | 0.862106  | 4.318115  |
| C    | 1.638641  | -1.286011 | 2.999619  |
| H    | -1.553741 | -2.830109 | 0.042374  |
| H    | -3.008148 | -2.832825 | -1.984802 |
| H    | -1.880951 | -1.446823 | -1.943970 |
| H    | -3.615494 | -1.218765 | -1.580017 |
| H    | -2.853668 | 0.946457  | -1.173203 |
| H    | -3.581665 | 2.048019  | 0.017197  |
| H    | -3.353897 | 0.406479  | 1.799545  |
| H    | -4.115356 | -0.362457 | 0.426926  |
| H    | -0.928497 | -2.115829 | 2.084259  |
| H    | -2.523438 | -1.710449 | 2.768509  |
| H    | -1.890289 | 0.589005  | 3.182587  |
| H    | -0.797745 | -0.530746 | 3.954361  |
| H    | 0.771561  | 2.439255  | 1.824158  |
| H    | -0.266205 | 2.446762  | 3.275833  |
| H    | -2.286102 | 2.290131  | 2.008500  |
| H    | -1.307434 | 3.567627  | 1.306534  |
| H    | -0.070343 | 3.103714  | -0.737991 |
| H    | -1.741989 | 3.338806  | -1.326874 |
| H    | -3.374786 | -3.272293 | 1.729172  |
| H    | -3.756180 | -3.964508 | 0.144700  |
| H    | -4.568359 | -2.471268 | 0.670609  |
| H    | 2.107422  | 0.654343  | 2.237396  |
| H    | 2.539047  | 0.572266  | 4.728668  |
| H    | 0.785751  | 0.523254  | 5.033493  |
| H    | 1.535034  | 1.963074  | 4.280579  |
| H    | 2.631119  | -1.458710 | 3.448380  |
| H    | 1.629562  | -1.742935 | 2.001373  |
| H    | 0.903366  | -1.819351 | 3.627457  |
| Fe   | 0.000000  | 0.000000  | 0.000000  |

**Table S4.** Zero-field splitting parameters from INDO/S-CI calculations for all models of  $\text{LFe}(\text{N}_3)_2$ .

|                        | Crystal structure | Geometry Optimized Models |              |
|------------------------|-------------------|---------------------------|--------------|
|                        |                   | ORCA (BP)                 | ORCA (B3LYP) |
| D ( $\text{cm}^{-1}$ ) | -0.341            | -0.422                    | -0.417       |
| E/D                    | 0.228             | 0.136                     | 0.155        |

**Table S5.** ORCA DFT (B3LYP) calculated spin-down molecular orbital compositions and energies for the model derived from the crystal structure.

| MO  | E (eV)  | occ | Fe d-orbitals |    |    |           |       | Azide <sub>1</sub><br>p-orbitals <sup>1</sup> | Azide <sub>2</sub><br>p-orbitals <sup>1</sup> | Carboxylate<br>p-orbitals <sup>1</sup> |
|-----|---------|-----|---------------|----|----|-----------|-------|-----------------------------------------------|-----------------------------------------------|----------------------------------------|
|     |         |     | xy            | yz | xz | $x^2-y^2$ | $z^2$ |                                               |                                               |                                        |
| 100 | -7.2220 | 1   | 1             | 0  | 6  | 0         | 0     | 0                                             | 5                                             | 39                                     |
| 101 | -6.7557 | 1   | 6             | 0  | 0  | 0         | 1     | 37                                            | 10                                            | 0                                      |
| 102 | -6.3291 | 1   | 1             | 5  | 0  | 1         | 1     | 27                                            | 1                                             | 33                                     |
| 103 | -6.2453 | 1   | 0             | 3  | 0  | 5         | 0     | 12                                            | 20                                            | 23                                     |
| 104 | -6.2108 | 1   | 2             | 1  | 2  | 0         | 1     | 5                                             | 26                                            | 22                                     |
| 105 | -5.9533 | 1   | 1             | 1  | 0  | 5         | 1     | 16                                            | 34                                            | 3                                      |
| 106 | -2.7522 | 0   | 37            | 9  | 1  | 31        | 0     | 2                                             | 4                                             | 0                                      |
| 107 | -2.6692 | 0   | 2             | 59 | 9  | 12        | 0     | 2                                             | 2                                             | 1                                      |
| 108 | -2.6392 | 0   | 1             | 8  | 69 | 0         | 8     | 1                                             | 1                                             | 1                                      |
| 109 | -1.5841 | 0   | 17            | 0  | 4  | 17        | 28    | 1                                             | 3                                             | 1                                      |
| 110 | -1.5124 | 0   | 16            | 1  | 1  | 13        | 37    | 2                                             | 0                                             | 1                                      |

**Table S6.** ORCA DFT (PBE0) calculated spin-down molecular orbital energies (eV), occupancies, and compositions (%) for the ORCA (BP) geometry optimized  $\text{LFe}(\text{N}_3)_2$  model.

| MO  | E       | occ | Fe d-orbitals |    |    |           |       | Azide <sub>1</sub><br>p-orbitals <sup>1</sup> | Azide <sub>2</sub><br>p-orbitals <sup>1</sup> | Carboxylate<br>p-orbitals <sup>1</sup> |
|-----|---------|-----|---------------|----|----|-----------|-------|-----------------------------------------------|-----------------------------------------------|----------------------------------------|
|     |         |     | xy            | yz | xz | $x^2-y^2$ | $z^2$ |                                               |                                               |                                        |
| 100 | -7.8499 | 1   | 1             | 0  | 5  | 0         | 0     | 1                                             | 10                                            | 38                                     |
| 101 | -7.2828 | 1   | 4             | 0  | 0  | 2         | 1     | 64                                            | 20                                            | 0                                      |
| 102 | -6.9750 | 1   | 0             | 2  | 0  | 0         | 1     | 14                                            | 0                                             | 5                                      |
| 103 | -6.9475 | 1   | 4             | 0  | 0  | 2         | 1     | 4                                             | 51                                            | 4                                      |
| 104 | -6.8720 | 1   | 0             | 4  | 1  | 4         | 0     | 48                                            | 15                                            | 4                                      |
| 105 | -6.5494 | 1   | 0             | 2  | 0  | 4         | 0     | 31                                            | 31                                            | 3                                      |
| 106 | -2.7551 | 0   | 5             | 39 | 1  | 31        | 1     | 11                                            | 3                                             | 2                                      |
| 107 | -2.6622 | 0   | 5             | 39 | 0  | 37        | 0     | 5                                             | 4                                             | 1                                      |
| 108 | -2.5522 | 0   | 0             | 1  | 81 | 1         | 5     | 1                                             | 3                                             | 2                                      |
| 109 | -2.0305 | 0   | 50            | 0  | 0  | 7         | 6     | 10                                            | 16                                            | 1                                      |
| 110 | -1.8502 | 0   | 6             | 0  | 3  | 1         | 60    | 9                                             | 2                                             | 5                                      |

**Table S7.** ORCA DFT (PBE0) calculated spin-down molecular orbital energies (eV), occupancies, and compositions (%) for the ORCA (B3LYP) geometry optimized  $\text{LFe}(\text{N}_3)_2$  model.

| MO  | E       | occ | Fe d-orbitals |    |    |           |       | Azide <sub>1</sub><br>p-orbitals <sup>1</sup> | Azide <sub>2</sub><br>p-orbitals <sup>1</sup> | Carboxylate<br>p-orbitals <sup>1</sup> |
|-----|---------|-----|---------------|----|----|-----------|-------|-----------------------------------------------|-----------------------------------------------|----------------------------------------|
|     |         |     | xy            | yz | xz | $x^2-y^2$ | $z^2$ |                                               |                                               |                                        |
| 100 | -7.8499 | 1   | 1             | 0  | 6  | 0         | 0     | 1                                             | 10                                            | 38                                     |
| 101 | -7.2828 | 1   | 5             | 0  | 0  | 1         | 1     | 62                                            | 20                                            | 0                                      |
| 102 | -6.9750 | 1   | 0             | 1  | 0  | 0         | 1     | 11                                            | 1                                             | 5                                      |
| 103 | -6.9475 | 1   | 3             | 1  | 0  | 3         | 1     | 6                                             | 50                                            | 4                                      |
| 104 | -6.8720 | 1   | 1             | 5  | 1  | 3         | 0     | 50                                            | 14                                            | 5                                      |
| 105 | -6.5494 | 1   | 0             | 2  | 0  | 4         | 0     | 29                                            | 33                                            | 3                                      |
| 106 | -2.7551 | 0   | 12            | 37 | 0  | 28        | 1     | 10                                            | 3                                             | 1                                      |
| 107 | -2.6622 | 0   | 11            | 41 | 1  | 29        | 0     | 4                                             | 4                                             | 1                                      |
| 108 | -2.5522 | 0   | 0             | 0  | 81 | 0         | 6     | 2                                             | 2                                             | 3                                      |
| 109 | -2.0305 | 0   | 42            | 0  | 0  | 16        | 5     | 10                                            | 10                                            | 1                                      |
| 110 | -1.8502 | 0   | 4             | 1  | 4  | 2         | 61    | 8                                             | 1                                             | 5                                      |

**Table S8.** Experimental transitions energies ( $\text{cm}^{-1}$ ) and TD-DFT predicted transition energies ( $\text{cm}^{-1}$ ) and band assignments using the B3LYP functional and the  $\text{LFe}(\text{N}_3)_2$  model derived from the crystal structure coordinates.

| Transition | Experimental | Calculated <sup>2</sup> | Peak Assignments <sup>3</sup>                                                                                   |
|------------|--------------|-------------------------|-----------------------------------------------------------------------------------------------------------------|
| 1          | 15 200       | 15 441                  | azide <sub>2</sub> $\pi^{\text{nb}}(\text{op}) \rightarrow 106-108$                                             |
|            |              | 15 913                  | azide <sub>2</sub> $\pi^{\text{nb}}(\text{op}) \rightarrow 106-108$                                             |
|            |              | 16 031                  | azide <sub>2</sub> $\pi^{\text{nb}}(\text{op}) \rightarrow 107/108$                                             |
| 2          | 17 300       | 16 289                  | azide <sub>2</sub> $\pi^{\text{nb}}(\text{ip}) \rightarrow 106-108$                                             |
|            |              | 17 291                  | azide <sub>2</sub> $\pi^{\text{nb}}(\text{ip}) \rightarrow 106-108$                                             |
| 3          | 19 100       | 18 523                  | azide <sub>2</sub> $\pi^{\text{nb}}(\text{ip}) \rightarrow 107$                                                 |
|            |              | 18 906                  | azide <sub>2</sub> $\pi^{\text{nb}}(\text{ip}) \rightarrow 108$                                                 |
| 4          | 20 650       | 19 772                  | azide <sub>1</sub> $\pi^{\text{nb}}(\text{op}) \rightarrow 106-108$                                             |
|            |              | 21 167                  | azide <sub>1</sub> $\pi^{\text{nb}}(\text{ip}) \rightarrow 106-108$                                             |
|            |              | 21 635                  | azide <sub>1</sub> $\pi^{\text{nb}}(\text{op}) \rightarrow 107/108$                                             |
| 5          | 22 500       | 22 138                  | azide <sub>1</sub> $\pi^{\text{nb}}(\text{ip}) \rightarrow 106$                                                 |
|            |              | 22 443                  | azide <sub>1</sub> $\pi^{\text{nb}}(\text{ip}) \rightarrow 107$                                                 |
|            |              | 22 734                  | azide <sub>1</sub> $\pi^{\text{nb}}(\text{ip}) \rightarrow 108$                                                 |
| 6          | 24 700       | 24 110                  | azide <sub>2</sub> $\pi^{\text{nb}}(\text{op}) \rightarrow 109$                                                 |
|            |              | 25 808                  | azide <sub>2</sub> $\pi^{\text{nb}}(\text{op}) \rightarrow 110$                                                 |
|            |              | 26 376                  | azide <sub>1</sub> $\pi^{\text{nb}}(\text{op})/\text{azide}_2$ $\pi^{\text{nb}}(\text{op}) \rightarrow 109/110$ |
| 7          | 27 150       | 26 737                  | O $\rightarrow \text{Fe}^{3+} 3d$                                                                               |
|            |              | 27 080                  | O $\rightarrow \text{Fe}^{3+} 3d$                                                                               |
|            |              | 27 820                  | O $\rightarrow \text{Fe}^{3+} 3d$                                                                               |
|            |              | 28 324                  | O $\rightarrow \text{Fe}^{3+} 3d$                                                                               |
|            |              | 29 277                  | O $\rightarrow \text{Fe}^{3+} 3d$                                                                               |
| 8          | 29 100       | 30 697                  | azide <sub>2</sub> $\pi^{\text{nb}}(\text{ip}) \rightarrow 109$                                                 |
|            |              | 31 472                  | azide <sub>1</sub> $\pi^{\text{nb}}(\text{op}) \rightarrow 109$                                                 |
| 9          | 31 130       | 31 856                  | azide <sub>1</sub> $\pi^{\text{nb}}(\text{ip}) \rightarrow 109$                                                 |
|            |              | 32 440                  | azide <sub>1</sub> $\pi^{\text{nb}}(\text{ip}) \rightarrow 110$                                                 |
|            |              | 32 935                  | O $\rightarrow \text{Fe}^{3+} 3d$                                                                               |

**Table S9.** Experimental transitions energies ( $\text{cm}^{-1}$ ) and TD-DFT predicted transition energies ( $\text{cm}^{-1}$ ) and band assignments using the PBE0 functional and the  $\text{LFe}(\text{N}_3)_2$  model geometry optimized using the BP functional.

| Transition | Experimental | Calculated <sup>2</sup> | Peak Assignments <sup>3</sup>                                   |
|------------|--------------|-------------------------|-----------------------------------------------------------------|
| 1          | 15 200       |                         |                                                                 |
| 2          | 17 300       | 18 430                  | azide <sub>2</sub> $\pi^{\text{nb}}(\text{op}) \rightarrow 106$ |
|            |              | 18 941                  | azide <sub>2</sub> $\pi^{\text{nb}}(\text{op}) \rightarrow 107$ |
| 3          | 19 100       | 19 430                  | azide <sub>2</sub> $\pi^{\text{nb}}(\text{op}) \rightarrow 108$ |
| 4          | 20 650       | 19 907                  | azide <sub>2</sub> $\pi^{\text{nb}}(\text{ip}) \rightarrow 107$ |
|            |              | 20 944                  | azide <sub>2</sub> $\pi^{\text{nb}}(\text{ip}) \rightarrow 108$ |
| 5          | 22 500       | 21 483                  | azide <sub>1</sub> $\pi^{\text{nb}}(\text{op}) \rightarrow 107$ |
|            |              | 21 913                  | azide <sub>1</sub> $\pi^{\text{nb}}(\text{op}) \rightarrow 108$ |
| 6          | 24 700       | 24 362                  | azide <sub>1</sub> $\pi^{\text{nb}}(\text{ip}) \rightarrow 107$ |
| 7          | 27 150       | 27 042                  | azide <sub>2</sub> $\pi^{\text{nb}}(\text{op}) \rightarrow 110$ |
|            |              | 27 617                  | azide <sub>2</sub> $\pi^{\text{nb}}(\text{ip}) \rightarrow 110$ |
| 8          | 29 100       | 29 390                  | azide <sub>1</sub> $\pi^{\text{nb}}(\text{op}) \rightarrow 110$ |
|            |              | 29 790                  | O $\rightarrow \text{Fe}^{3+} 3d$                               |
| 9          | 31 130       | 31 160                  | azide <sub>1</sub> $\pi^{\text{nb}}(\text{ip}) \rightarrow 110$ |
|            |              | 31 333                  | O $\rightarrow \text{Fe}^{3+} 3d$                               |
| 10         | 33 600       | 33 029                  | O $\rightarrow \text{Fe}^{3+} 3d$                               |

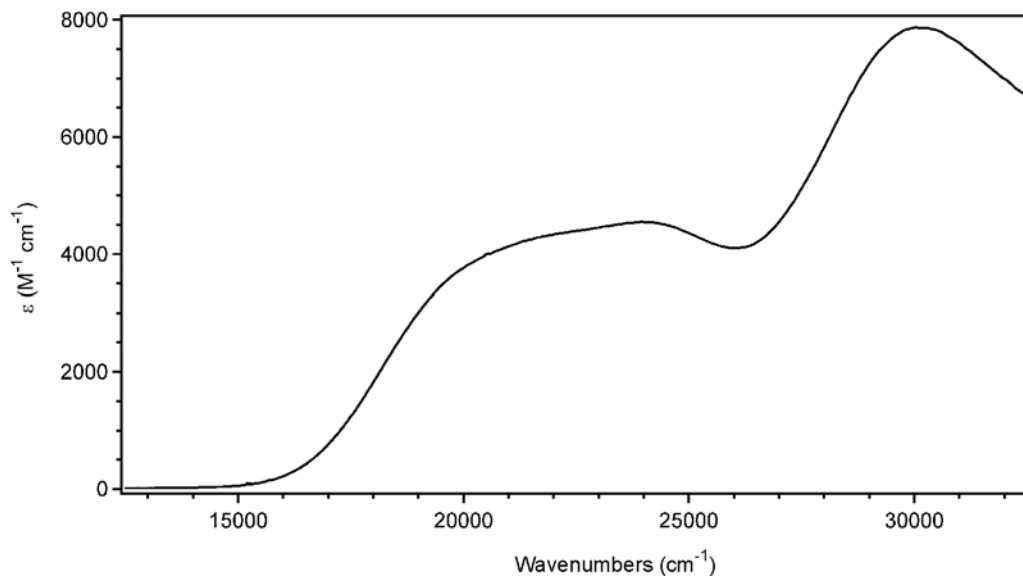

**Figure S1.** Electronic absorption spectrum of  $\text{LFe}(\text{N}_3)_2$  at room temperature.

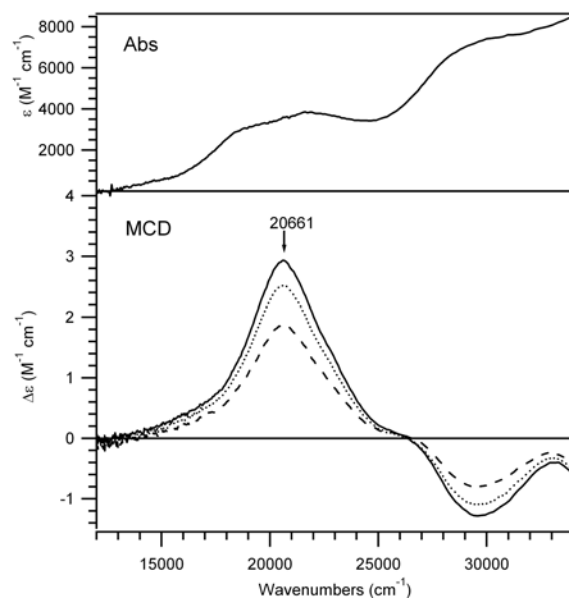

**Figure S2.** Electronic absorption spectrum at 4.5 K (top) and variable-temperature MCD spectra (4.5, 8, and 15 K) (bottom) of a mull sample of  $\text{LFe}(\text{N}_3)_2$ . All MCD features decrease with increasing temperature, consistent with their expected C-term behavior.

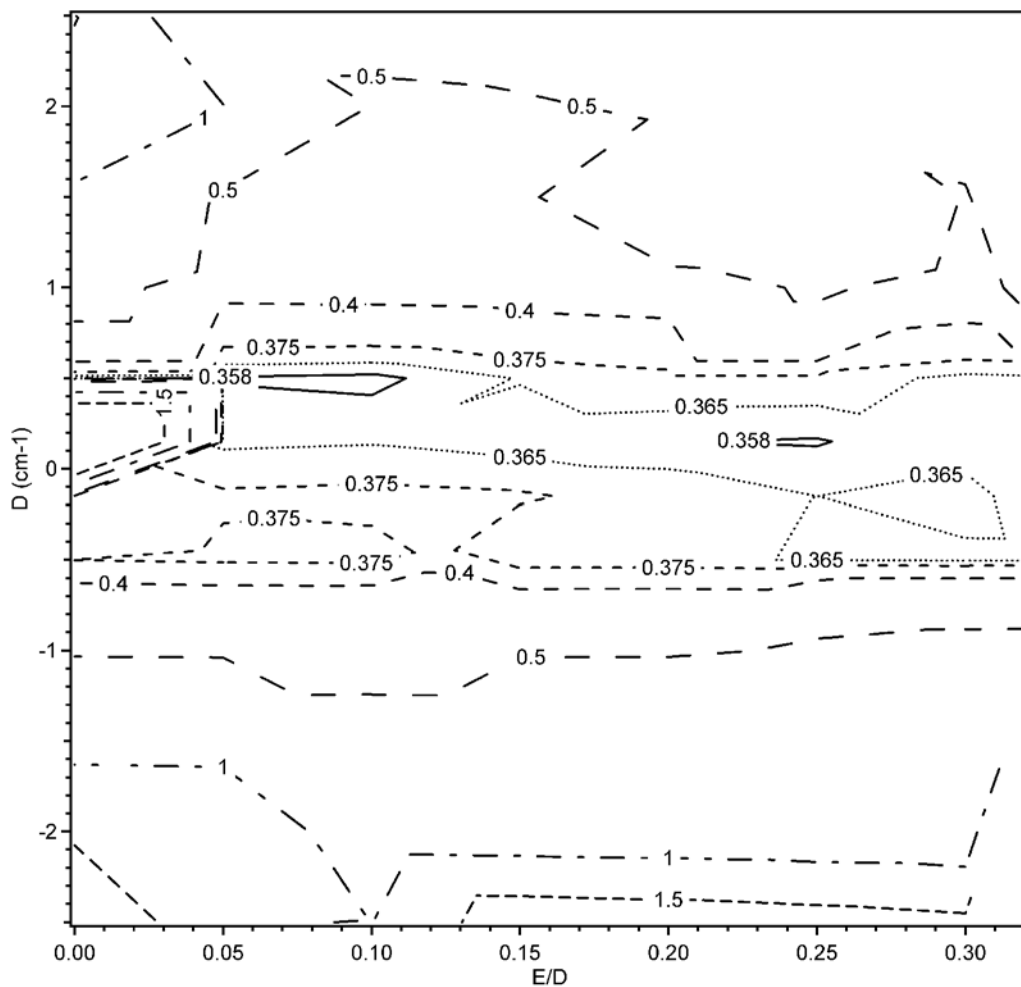

**Figure S3.** Contour plot of  $\chi^2$  values as a function of  $D$  and  $E/D$  parameters for fits of VTVH MCD data of  $\text{LFe}(\text{N}_3)_2$  collected at  $20\,661\text{ cm}^{-1}$  (484 nm). Transition polarizations are given in Table S10.



**Table S10.** Zero-field splitting parameters  $D$  ( $\text{cm}^{-1}$ ) and  $E/D$ , polarizations (%) and  $\chi^2$  values from an analysis of VTVH MCD data for  $\text{LFe}(\text{N}_3)_2$  collected at  $20\,661\text{ cm}^{-1}$  (484 nm).

| D    | E/D  | x   | y  | z  | $\chi^2$ | D     | E/D  | x  | y  | z   | $\chi^2$ |
|------|------|-----|----|----|----------|-------|------|----|----|-----|----------|
| 2.5  | 0    | 18  | 5  | 77 | 1.511    | -0.15 | 0    | 5  | 3  | 92  | 0.389    |
| 2.5  | 0.05 | 1   | 99 | 0  | 0.515    | -0.15 | 0.05 | 7  | 3  | 90  | 0.377    |
| 2.5  | 0.1  | 12  | 86 | 1  | 0.516    | -0.15 | 0.1  | 49 | 6  | 45  | 0.378    |
| 2.5  | 0.15 | 64  | 34 | 2  | 0.526    | -0.15 | 0.15 | 75 | 4  | 21  | 0.376    |
| 2.5  | 0.2  | 96  | 3  | 0  | 0.552    | -0.15 | 0.2  | 48 | 6  | 46  | 0.370    |
| 2.5  | 0.25 | 100 | 0  | 0  | 0.601    | -0.15 | 0.25 | 28 | 5  | 67  | 0.365    |
| 2.5  | 0.3  | 100 | 0  | 0  | 0.677    | -0.15 | 0.3  | 82 | 3  | 15  | 0.368    |
| 2    | 0    | 96  | 1  | 3  | 1.397    | -0.5  | 0    | 10 | 19 | 71  | 0.375    |
| 2    | 0.05 | 95  | 2  | 3  | 1.011    | -0.5  | 0.05 | 27 | 7  | 66  | 0.372    |
| 2    | 0.1  | 0   | 99 | 0  | 0.492    | -0.5  | 0.1  | 20 | 9  | 71  | 0.371    |
| 2    | 0.15 | 15  | 84 | 1  | 0.495    | -0.5  | 0.15 | 33 | 4  | 63  | 0.366    |
| 2    | 0.2  | 73  | 26 | 1  | 0.507    | -0.5  | 0.2  | 23 | 6  | 71  | 0.366    |
| 2    | 0.25 | 98  | 2  | 0  | 0.531    | -0.5  | 0.25 | 22 | 6  | 72  | 0.365    |
| 2    | 0.3  | 14  | 72 | 14 | 0.571    | -0.5  | 0.3  | 23 | 5  | 72  | 0.364    |
| 1.5  | 0    | 100 | 0  | 0  | 0.924    | -1    | 0    | 1  | 2  | 97  | 0.473    |
| 1.5  | 0.05 | 1   | 99 | 0  | 0.459    | -1    | 0.05 | 1  | 1  | 98  | 0.471    |
| 1.5  | 0.1  | 3   | 96 | 1  | 0.459    | -1    | 0.1  | 1  | 1  | 98  | 0.472    |
| 1.5  | 0.15 | 2   | 97 | 0  | 0.460    | -1    | 0.15 | 0  | 1  | 99  | 0.471    |
| 1.5  | 0.2  | 94  | 2  | 4  | 0.771    | -1    | 0.2  | 0  | 0  | 99  | 0.472    |
| 1.5  | 0.25 | 92  | 3  | 6  | 0.803    | -1    | 0.25 | 2  | 1  | 97  | 0.520    |
| 1.5  | 0.3  | 94  | 6  | 0  | 0.488    | -1    | 0.3  | 1  | 0  | 98  | 0.541    |
| 1    | 0    | 45  | 28 | 27 | 0.584    | -1.5  | 0    | 18 | 7  | 75  | 0.860    |
| 1    | 0.05 | 4   | 94 | 2  | 0.409    | -1.5  | 0.05 | 7  | 16 | 77  | 0.846    |
| 1    | 0.1  | 14  | 81 | 5  | 0.410    | -1.5  | 0.1  | 0  | 0  | 100 | 0.530    |
| 1    | 0.15 | 28  | 67 | 5  | 0.412    | -1.5  | 0.15 | 8  | 11 | 80  | 0.837    |
| 1    | 0.2  | 39  | 57 | 4  | 0.415    | -1.5  | 0.2  | 11 | 8  | 81  | 0.867    |
| 1    | 0.25 | 100 | 0  | 0  | 0.524    | -1.5  | 0.25 | 9  | 8  | 83  | 0.852    |
| 1    | 0.3  | 35  | 64 | 1  | 0.425    | -1.5  | 0.3  | 0  | 0  | 100 | 0.507    |
| 0.5  | 0    | 89  | 0  | 10 | 0.359    | -2    | 0    | 15 | 19 | 65  | 1.391    |
| 0.5  | 0.05 | 35  | 4  | 60 | 0.357    | -2    | 0.05 | 16 | 18 | 66  | 1.382    |
| 0.5  | 0.1  | 45  | 15 | 41 | 0.356    | -2    | 0.1  | 0  | 0  | 100 | 0.721    |
| 0.5  | 0.15 | 94  | 0  | 6  | 0.366    | -2    | 0.15 | 0  | 0  | 100 | 0.701    |
| 0.5  | 0.2  | 93  | 0  | 7  | 0.371    | -2    | 0.2  | 0  | 0  | 100 | 0.677    |
| 0.5  | 0.25 | 98  | 0  | 2  | 0.371    | -2    | 0.25 | 0  | 0  | 100 | 0.650    |
| 0.5  | 0.3  | 69  | 4  | 27 | 0.362    | -2    | 0.3  | 0  | 0  | 100 | 0.624    |
| 0.15 | 0    | 6   | 1  | 92 | 3.241    | -2.5  | 0    | 14 | 12 | 74  | 2.105    |
| 0.15 | 0.05 | 13  | 14 | 72 | 0.363    | -2.5  | 0.05 | 0  | 0  | 100 | 1.022    |
| 0.15 | 0.1  | 6   | 4  | 91 | 0.364    | -2.5  | 0.1  | 0  | 0  | 100 | 0.993    |
| 0.15 | 0.15 | 45  | 5  | 51 | 0.360    | -2.5  | 0.15 | 19 | 20 | 60  | 1.824    |
| 0.15 | 0.2  | 68  | 4  | 27 | 0.360    | -2.5  | 0.2  | 20 | 18 | 62  | 1.772    |
| 0.15 | 0.25 | 90  | 2  | 8  | 0.357    | -2.5  | 0.25 | 18 | 18 | 64  | 1.695    |
| 0.15 | 0.3  | 62  | 5  | 33 | 0.361    | -2.5  | 0.3  | 16 | 20 | 64  | 1.594    |

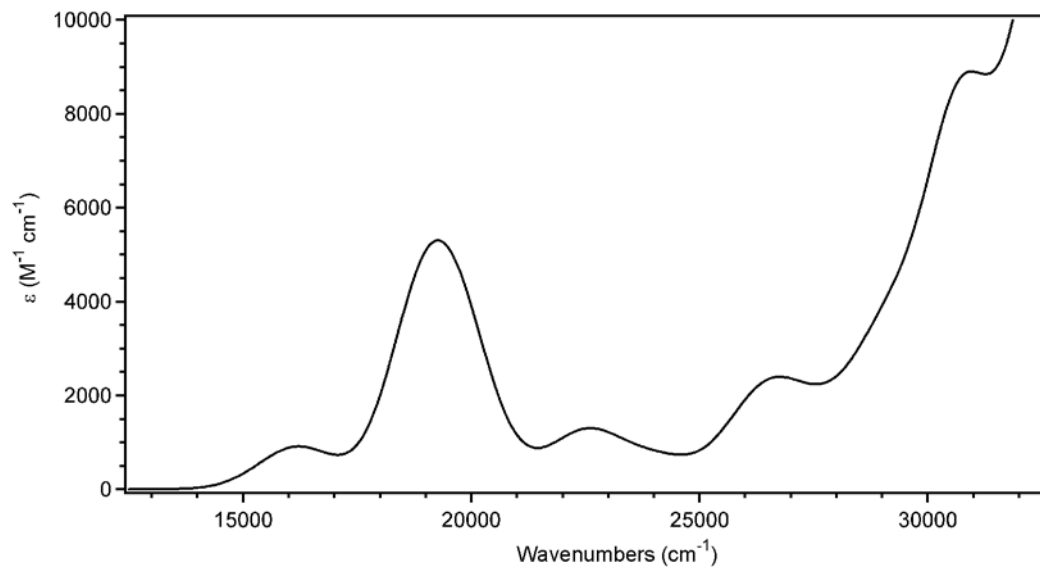

**Figure S4.** Computed electronic absorption spectrum of LFe(N<sub>3</sub>)<sub>2</sub> using the B3LYP functional and the model derived from crystal structure coordinates.
